# Supplementary material
Source: HighWire-hosted journal article supplement (https://www.annfammed.org/highwire/filestream/8137/field_highwire_adjunct_files/0/Bennett_Supp_App.pdf)
Supplement: Bennett_Supp_App.pdf [file Bennett_Supp_App.pdf]

**Online Supplementary Material**

Bennett IM, Johnson M, Kalkstein K, Gillespie G, Bellamy S, Fleischman J. Early abortion in family medicine: clinical outcomes. *Ann Fam Med.* 2009;7(6):527-533.

<http://www.annfammed.org/cgi/content/full/7/6/527/DC1>

**Supplemental Figure 1. Kaplan-Meier Analysis of complication-free survival probabilities comparing more-experienced physicians with less-experienced physicians for MED and ASP procedures.**

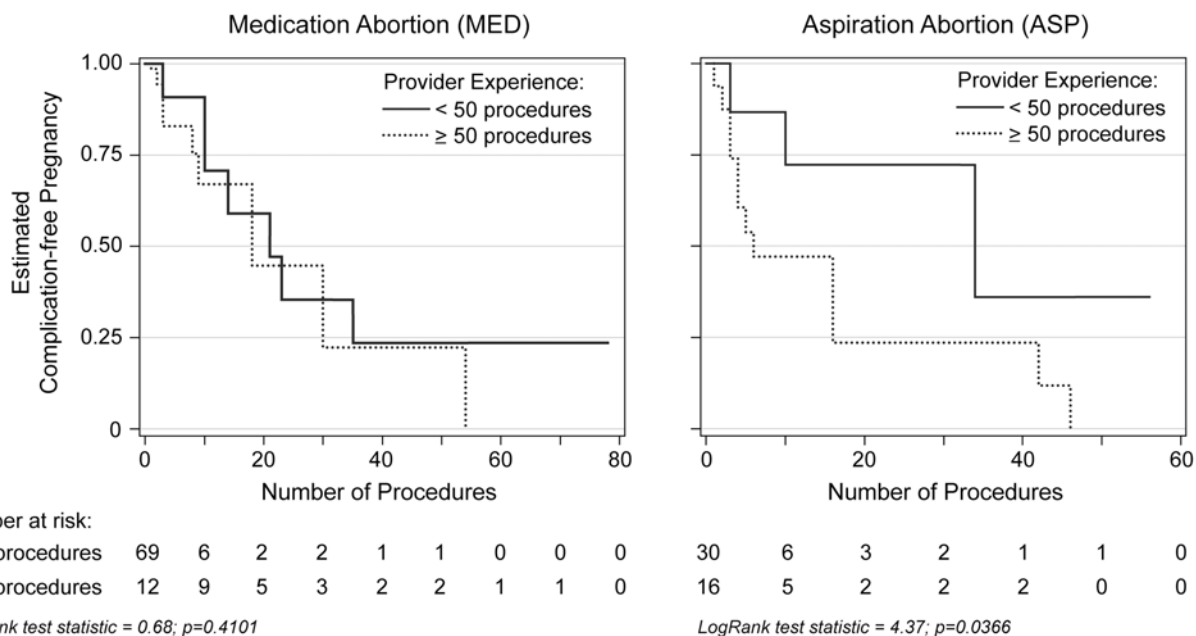

We examined the time to first complication using a Kaplan-Meier analysis and corresponding logrank test statistics comparing the distribution of estimated complication-free probabilities (eg, estimated survival) for more-experienced physicians ( $\geq 50$  prior procedures) with less-experienced physicians ( $< 50$  prior procedures). Physicians with less experience did not have shorter time to first complication than those with more experience; there was no significant difference in time to first MED complication (panel A). Physicians with less experience actually had a significantly longer time to complication for the ASP procedure than those with more experience ( $P = .037$ ).
